# Supplementary material
Source: PubMed Central journal article supplement (PMC5494011)
Supplement: NIHMS838022-supplement-supplement_1.pdf [file NIHMS838022-supplement-supplement_1.pdf]

**Supplemental Table 1.** *Effects of experimental conditions on the evoked discrete emotions*

| <b>Anger</b>                      | <b>Moist Snuff</b>         |         | <b>Snus</b>                |         | <b>E-cigarettes</b>        |         |
|-----------------------------------|----------------------------|---------|----------------------------|---------|----------------------------|---------|
|                                   | Non-smokers                | Smokers | Non-smokers                | Smokers | Non-smokers                | Smokers |
| No warning label                  | 4.11                       | 3.11    | 4.20                       | 2.86    | 4.01                       | 2.85    |
| Current warning label             | 4.35                       | 3.40    | 4.19                       | 3.39    | 4.24                       | 3.13    |
| Lower risk                        | 4.11                       | 3.33    | 4.24                       | 3.17    | 4.09                       | 2.83    |
| FDA-approved                      | 5.23                       | 3.16    | 4.93                       | 3.14    | 4.63                       | 2.89    |
| Graphic warning label             | 5.06                       | 4.67    | 4.86                       | 4.67    | 5.07                       | 4.78    |
| Main effect condition             | $F(4, 1208)=7.5$ ***       |         | $F(4, 1207)=7.12$ ***      |         | $F(4, 1207)=11.78$ ***     |         |
| Main effect smoker vs. non-smoker | $F(1, 1208)=39.1$ ***      |         | $F(1, 1207)=40.66$ ***     |         | $F(1, 1207)=47.62$ ***     |         |
| Interaction                       | $F(4, 1208)=2.91, p=0.021$ |         | $F(4, 1207)=2.76, p=0.027$ |         | $F(4, 1207)=2.13, p=0.075$ |         |
| <b>Anxiety</b>                    |                            |         |                            |         |                            |         |
| No warning label                  | 3.98                       | 3.01    | 4.11                       | 2.97    | 3.89                       | 2.75    |
| Current warning label             | 4.20                       | 3.43    | 4.26                       | 3.46    | 4.21                       | 3.32    |
| Lower risk                        | 3.59                       | 3.39    | 3.60                       | 3.19    | 3.47                       | 2.97    |
| FDA-approved                      | 4.88                       | 3.29    | 4.79                       | 3.27    | 4.37                       | 3.02    |
| Graphic warning label             | 5.05                       | 5.34    | 4.90                       | 5.30    | 5.15                       | 5.37    |
| Main effect condition             | $F(4, 1206)=15.52$ ***     |         | $F(4, 1203)=13.76$ ***     |         | $F(4, 1208)=21.99$ ***     |         |
| Main effect smoker vs. non-smoker | $F(1, 1206)=16.29$ ***     |         | $F(1, 1203)=18.33$ ***     |         | $F(1, 1208)=21.57$ ***     |         |
| Interaction                       | $F(4, 1206)=4.12$ **       |         | $F(4, 1203)=4.23$ **       |         | $F(4, 1208)=3.13$ *        |         |
| <b>Sadness</b>                    |                            |         |                            |         |                            |         |
| No warning label                  | 3.64                       | 2.86    | 3.87                       | 2.73    | 3.54                       | 2.71    |
| Current warning label             | 3.41                       | 3.31    | 3.19                       | 3.38    | 3.38                       | 3.14    |
| Lower risk                        | 3.33                       | 3.16    | 3.42                       | 2.98    | 3.05                       | 2.84    |
| FDA-approved                      | 4.51                       | 3.03    | 4.24                       | 3.06    | 4.15                       | 2.83    |
| Graphic warning label             | 4.63                       | 4.98    | 4.44                       | 5.00    | 4.56                       | 4.97    |
| Main effect condition             | $F(4, 1206)=13.95$ ***     |         | $F(4, 1203)=12.51$ ***     |         | $F(4, 1204)=17.17$ ***     |         |
| Main effect smoker vs. non-smoker | $F(1, 1206)=7.49$ **       |         | $F(1, 1203)=6.21$ *        |         | $F(1, 1204)=7.92$ **       |         |
| Interaction                       | $F(4, 1206)=4.06$ **       |         | $F(4, 1203)=4.73$ **       |         | $F(4, 1204)=3.66$ **       |         |
| <b>Guilt</b>                      |                            |         |                            |         |                            |         |
| No warning label                  | 2.27                       | 2.83    | 2.56                       | 2.96    | 2.51                       | 2.7     |
| Current warning label             | 1.83                       | 3.2     | 2.23                       | 3.18    | 2.13                       | 2.95    |
| Lower risk                        | 2.31                       | 3.31    | 2.18                       | 3.08    | 2.22                       | 3.14    |
| FDA-approved                      | 2.81                       | 3.02    | 2.56                       | 3.22    | 2.56                       | 3.07    |
| Graphic warning label             | 2.83                       | 4.7     | 2.59                       | 4.82    | 2.47                       | 4.89    |
| Main effect condition             | $F(4, 1200)=7.95$ ***      |         | $F(4, 1199)=5.95$ ***      |         | $F(4, 1198)=7.3$ ***       |         |
| Main effect smoker vs. non-smoker | $F(1, 1200)=39.09$ ***     |         | $F(1, 1199)=40.89$ ***     |         | $F(1, 1198)=39.03$ ***     |         |
| Interaction                       | $F(4, 1200)=3.37$ **       |         | $F(4, 1199)=3.9$ **        |         | $F(4, 1198)=6.21$ ***      |         |

| <b>Disgust</b>                    | <b>Moist Snuff</b>        |         | <b>Snus</b>               |         | <b>E-cigarettes</b>       |         |
|-----------------------------------|---------------------------|---------|---------------------------|---------|---------------------------|---------|
|                                   | Non-smokers               | Smokers | Non-smokers               | Smokers | Non-smokers               | Smokers |
| No warning label                  | 5.16                      | 3.55    | 4.9                       | 3.03    | 3.92                      | 2.55    |
| Current warning label             | 4.97                      | 3.76    | 4.68                      | 3.66    | 4.58                      | 2.88    |
| Lower risk                        | 4.69                      | 3.65    | 4.23                      | 3.16    | 3.63                      | 2.79    |
| FDA-approved                      | 5.5                       | 3.6     | 5.06                      | 3.61    | 4.48                      | 2.91    |
| Graphic warning label             | 6.83                      | 6.28    | 6.42                      | 6.05    | 6.37                      | 5.88    |
| Main effect condition             | $F(4, 1198)=26$ ***       |         | $F(4, 1197)=27.69$ ***    |         | $F(4, 1201)=44.15$ ***    |         |
| Main effect smoker vs. non-smoker | $F(1, 1198)=52.11$ ***    |         | $F(1, 1197)=44.75$ ***    |         | $F(1, 1201)=53.09$ ***    |         |
| Interaction                       | $F(4, 1198)=1.84, p=0.12$ |         | $F(4, 1197)=2.09, p=0.08$ |         | $F(4, 1201)=1.94, p=0.10$ |         |
| <b>Discouragement</b>             |                           |         |                           |         |                           |         |
| No warning label                  | 3.72                      | 3.23    | 3.86                      | 2.93    | 4.03                      | 2.78    |
| Current warning label             | 3.86                      | 3.29    | 3.55                      | 3.43    | 4.1                       | 3.12    |
| Lower risk                        | 3.45                      | 3.25    | 3.51                      | 3.06    | 3.29                      | 2.94    |
| FDA-approved                      | 4.94                      | 3.28    | 4.57                      | 3.19    | 4.12                      | 2.91    |
| Graphic warning label             | 5.2                       | 5.11    | 4.9                       | 5.24    | 5.15                      | 5.13    |
| Main effect condition             | $F(4, 1193)=14.83$ ***    |         | $F(4, 1196)=14.93$ ***    |         | $F(4, 1196)=17.81$ ***    |         |
| Main effect smoker vs. non-smoker | $F(1, 1193)=12.14$ **     |         | $F(1, 1196)=8.93$ **      |         | $F(1, 1196)=20.26$ ***    |         |
| Interaction                       | $F(4, 1193)=2.64$ *       |         | $F(4, 1196)=3.18$ *       |         | $F(4, 1196)=2.14, p=0.07$ |         |
| <b>Hope</b>                       |                           |         |                           |         |                           |         |
| No warning label                  | 2.18                      | 3.47    | 2.54                      | 3.85    | 2.99                      | 4.75    |
| Current warning label             | 1.83                      | 3.52    | 2.01                      | 3.75    | 2.09                      | 4.23    |
| Lower risk                        | 1.74                      | 3.49    | 1.88                      | 4.07    | 2.21                      | 4.89    |
| FDA-approved                      | 2.42                      | 3.23    | 2.59                      | 3.7     | 3.13                      | 4.98    |
| Graphic warning label             | 2.14                      | 3.27    | 2.02                      | 3.33    | 2.18                      | 3.53    |
| Main effect condition             | $F(4, 1201)=0.31, p=0.88$ |         | $F(4, 1199)=1.51, p=0.20$ |         | $F(4, 1199)=8.26$ ***     |         |
| Main effect smoker vs. non-smoker | $F(1, 1201)=77.86$ ***    |         | $F(1, 1199)=98.3$ ***     |         | $F(1, 1199)=159.78$ ***   |         |
| Interaction                       | $F(4, 1201)=1.32, p=0.26$ |         | $F(4, 1199)=1.56, p=0.18$ |         | $F(4, 1199)=2.02, p=0.09$ |         |
| <b>Contentment</b>                |                           |         |                           |         |                           |         |
| No warning label                  | 2.27                      | 3.47    | 2.51                      | 3.77    | 2.62                      | 4.38    |
| Current warning label             | 1.85                      | 3.32    | 2.06                      | 3.46    | 1.98                      | 3.72    |
| Lower risk                        | 1.97                      | 3.59    | 1.80                      | 3.79    | 2.01                      | 4.23    |
| FDA-approved                      | 2.21                      | 3.43    | 2.59                      | 3.82    | 2.64                      | 4.21    |
| Graphic warning label             | 1.81                      | 3.08    | 1.93                      | 2.97    | 1.84                      | 3.19    |
| Main effect condition             | $F(4, 1207)=1.35, p=0.25$ |         | $F(4, 1203)=3.98$ **      |         | $F(4, 1206)=7.44$ ***     |         |
| Main effect smoker vs. non-smoker | $F(1, 1207)=98.25$ ***    |         | $F(1, 1203)=99.08$ ***    |         | $F(1, 1206)=165.44$ ***   |         |
| Interaction                       | $F(4, 1207)=0.35, p=0.84$ |         | $F(4, 1203)=1.33, p=0.26$ |         | $F(4, 1206)=1.14, p=0.34$ |         |

Note: A 5 (label condition: current warning label, graphic warning label, lower risk, "FDA Approved," no label) x 2 (smoker status: smoker/non-smoker) analyses of variance (ANOVAs) were performed separately each of the eight emotions and for three products (n=1,226 minus small amount of missing data, ranging between 9 and 23)

\* $p < .05$ . \*\* $p < .01$ . \*\*\* $p < .001$

**Supplemental Table 2.** *Multivariable Associations between Demographics, Past Tobacco Use, Warning Label Condition, and Emotions and Openness to Trying Alternative Tobacco Products Among Non-Smokers*

|                               | Moist snuff                 |                          | Snus                        |                          | E-cigarettes                |                             |
|-------------------------------|-----------------------------|--------------------------|-----------------------------|--------------------------|-----------------------------|-----------------------------|
|                               | Model 1<br>B (95% CI)       | Model 2<br>B (95% CI)    | Model 1<br>B (95% CI)       | Model 2<br>B (95% CI)    | Model 1<br>B (95% CI)       | Model 2<br>B (95% CI)       |
| Ever tried product            | 0.09 (-1.14, 1.32)          | 0.12 (-1.09, 1.33)       | 0.34 (-0.82, 1.51)          | 0.43 (-0.67, 1.53)       | <b>2.0 (0.79, 3.21)</b>     | <b>1.32 (0.16, 2.48)</b>    |
| Gender (female)               | -0.18 (-0.46, 0.11)         | -0.09 (-0.37, 0.19)      | <b>-0.42 (-0.71, -0.12)</b> | -0.25 (-0.53, 0.04)      | <b>-0.39 (-0.74, -0.04)</b> | -0.25 (-0.59, 0.09)         |
| Non-white                     | <b>-0.36 (-0.65, -0.08)</b> | -0.27 (-0.56, 0.02)      | -0.12 (-0.42, 0.18)         | 0.02 (-0.26, 0.31)       | <b>-0.46 (-0.82, -0.1)</b>  | <b>-0.35 (-0.69, 0)</b>     |
| Age                           | 0.0 (-0.01, 0.01)           | 0.0 (-0.01, 0.01)        | <b>-0.01 (-0.02, 0)</b>     | <b>-0.01 (-0.02, 0)</b>  | -0.01 (-0.02, 0)            | -0.01 (-0.02, 0)            |
| Current WL                    | <b>0.56 (0.12, 1)</b>       | <b>0.67 (0.24, 1.1)</b>  | 0.22 (-0.23, 0.68)          | 0.38 (-0.05, 0.81)       | -0.04 (-0.6, 0.51)          | 0.22 (-0.31, 0.74)          |
| Lower risk WL                 | 0.01 (-0.44, 0.45)          | 0.07 (-0.37, 0.5)        | -0.19 (-0.65, 0.27)         | -0.03 (-0.47, 0.41)      | 0.45 (-0.11, 1)             | <b>0.71 (0.18, 1.23)</b>    |
| FDA-approved WL               | 0.05 (-0.38, 0.48)          | 0.08 (-0.35, 0.5)        | 0.0 (-0.45, 0.45)           | 0.04 (-0.39, 0.46)       | -0.07 (-0.6, 0.47)          | -0.08 (-0.59, 0.43)         |
| Graphic WL                    | 0.11 (-0.33, 0.54)          | 0.26 (-0.18, 0.69)       | -0.25 (-0.69, 0.2)          | 0.03 (-0.4, 0.46)        | -0.06 (-0.6, 0.49)          | 0.19 (-0.35, 0.74)          |
| Anger                         |                             | -0.02 (-0.11, 0.07)*     |                             | -0.03 (-0.12, 0.07)      |                             | <b>-0.17 (-0.28, -0.05)</b> |
| Anxiety                       |                             | -0.02 (-0.13, 0.08)      |                             | -0.05 (-0.15, 0.06)      |                             | 0.02 (-0.11, 0.14)          |
| Sadness                       |                             | 0.06 (-0.04, 0.16)       |                             | 0.01 (-0.09, 0.11)       |                             | 0.08 (-0.04, 0.2)           |
| Guilt                         |                             | -0.03 (-0.1, 0.05)       |                             | 0.01 (-0.07, 0.09)       |                             | 0.02 (-0.07, 0.11)          |
| Disgust                       |                             | -0.03 (-0.1, 0.04)       |                             | -0.05 (-0.12, 0.02)      |                             | 0.01 (-0.08, 0.1)           |
| Discouragement                |                             | 0.01 (-0.07, 0.09)       |                             | 0.01 (-0.08, 0.1)        |                             | 0.01 (-0.08, 0.11)          |
| Hope                          |                             | 0.0 (-0.1, 0.09)*        |                             | <b>0.15 (0.06, 0.25)</b> |                             | <b>0.22 (0.12, 0.33)</b>    |
| Contentment                   |                             | <b>0.23 (0.12, 0.34)</b> |                             | <b>0.12 (0, 0.23)</b>    |                             | 0.05 (-0.09, 0.19)          |
| R <sup>2</sup> <sub>adj</sub> | <b>0.03</b>                 | <b>0.09</b>              | <b>0.03</b>                 | <b>0.14</b>              | <b>0.06</b>                 | <b>0.17</b>                 |
| Δ R <sup>2</sup>              |                             | <b>0.08</b>              |                             | <b>0.13</b>              |                             | <b>0.13</b>                 |

Note: Multivariable linear regressions, unstandardized regression coefficients (n=403). Boldface indicates statistical significance ( $p < .05$ )

WL – warning labels. Warning labels conditions are in comparison to the condition with no warning.

\* - Significant difference ( $p < .05$ ) between the slope coefficient for non-smokers and the corresponding slope coefficient for smokers shown in Supplemental Table 4 obtained via tests of the interactions of smoking status (smoker vs. non-smoker) by emotion (each discrete emotion) to test invariance of main effects of emotions (n=1,226) across groups.

**Supplemental Table 3.** *Multivariable Associations between Demographics, Past Tobacco Use, Warning Label Condition, and Emotions and Interest in a Free Sample of Alternative Tobacco Products Among Non-Smokers*

|                                           | Moist snuff             |                          | Snus                    |                          | E-cigarettes            |                           |
|-------------------------------------------|-------------------------|--------------------------|-------------------------|--------------------------|-------------------------|---------------------------|
|                                           | Model 1<br>AOR (95% CI) | Model 2<br>AOR (95% CI)  | Model 1<br>AOR (95% CI) | Model 2<br>AOR (95% CI)  | Model 1<br>AOR (95% CI) | Model 2<br>AOR (95% CI)   |
| Ever tried product                        | 5.4 (0.53, 55.43)       | 5.44 (0.42, 69.78)       | 1.53 (0.16, 14.3)       | 1.92 (0.19, 19.13)       | 4 (0.91, 17.56)         | 2.49 (0.49, 12.74)        |
| Gender (female)                           | 0.59 (0.24, 1.45)       | 0.71 (0.28, 1.81)        | 0.53 (0.25, 1.15)       | 0.72 (0.32, 1.64)        | 0.89 (0.48, 1.64)       | 1.1 (0.57, 2.13)          |
| Non-white                                 | 1.45 (0.58, 3.61)       | 1.04 (0.4, 2.72)         | 1.34 (0.62, 2.89)       | 1.01 (0.44, 2.32)        | 1.52 (0.82, 2.83)       | 1.23 (0.63, 2.43)         |
| Age                                       | 0.98 (0.95, 1.01)       | 0.98 (0.95, 1.01)        | 0.99 (0.96, 1.01)       | 0.99 (0.96, 1.02)        | 0.98 (0.97, 1)          | 0.98 (0.96, 1)            |
| Current WL                                | 2.56 (0.47, 13.97)      | 2.53 (0.44, 14.67)       | 1.22 (0.31, 4.79)       | 1.4 (0.33, 5.94)         | 0.55 (0.2, 1.53)        | 0.76 (0.25, 2.29)         |
| Lower risk WL                             | 2.2 (0.38, 12.71)       | 2.09 (0.34, 12.83)       | 1.55 (0.41, 5.77)       | 1.8 (0.45, 7.18)         | 1.31 (0.54, 3.18)       | 1.71 (0.65, 4.54)         |
| FDA-approved WL                           | 2.45 (0.45, 13.35)      | 2.39 (0.42, 13.59)       | 2.16 (0.63, 7.41)       | 2.32 (0.64, 8.39)        | 0.82 (0.32, 2.07)       | 0.98 (0.37, 2.62)         |
| Graphic WL                                | 3.16 (0.6, 16.83)       | 3.71 (0.64, 21.53)       | 1.58 (0.44, 5.71)       | 2.58 (0.64, 10.41)       | 0.8 (0.31, 2.03)        | 1.89 (0.62, 5.78)         |
| Anger                                     |                         | 0.78 (0.55, 1.11)        |                         | 0.9 (0.63, 1.29)         |                         | 0.75 (0.55, 1.01)         |
| Anxiety                                   |                         | 0.95 (0.59, 1.55)        |                         | 0.93 (0.63, 1.38)        |                         | 0.89 (0.63, 1.26)         |
| Sadness                                   |                         | 0.99 (0.63, 1.57)        |                         | 1.03 (0.69, 1.56)        |                         | 0.95 (0.7, 1.29)          |
| Guilt                                     |                         | <b>1.38 (1.01, 1.89)</b> |                         | 1.24 (0.91, 1.67)        |                         | <b>1.31 (1.05, 1.64)*</b> |
| Disgust                                   |                         | 0.91 (0.7, 1.18)         |                         | <b>0.73 (0.57, 0.93)</b> |                         | 0.87 (0.7, 1.07)          |
| Discouragement                            |                         | 1.05 (0.71, 1.56)        |                         | 1.13 (0.76, 1.67)        |                         | 1.17 (0.93, 1.47)         |
| Hope                                      |                         | 1.04 (0.79, 1.37)        |                         | 1.28 (1, 1.64)           |                         | <b>1.34 (1.11, 1.63)</b>  |
| Contentment                               |                         | 1.24 (0.9, 1.7)          |                         | 1.07 (0.79, 1.44)        |                         | 0.89 (0.69, 1.17)         |
| Nagerlkerke R <sup>2</sup> <sub>adj</sub> | <b>0.06</b>             | <b>0.18</b>              | <b>0.04</b>             | <b>0.21</b>              | <b>0.05</b>             | <b>0.22</b>               |

Note: Multivariable logistic regressions (n=403). AOR – adjusted odds ratios. Boldface indicates statistical significance ( $p < .05$ )

WL – warning labels. Warning labels conditions are in comparison to the condition with no warning.

\* - Significant difference ( $p < .05$ ) between the slope coefficient for non-smokers and the corresponding slope coefficient for smokers shown in Supplemental Table 5 obtained via tests of the interactions of smoking status (smoker vs. non-smoker) by emotion (each discrete emotion) to test invariance of main effects of emotions (n=1,226) across groups.

**Supplemental Table 4.** *Multivariable Associations between Demographics, Past Tobacco Use, Warning Label Condition, and Emotions and Openness to Trying Alternative Tobacco Products Among Smokers*

|                    | Moist snuff                 |                              | Snus                        |                             | E-cigarettes               |                          |
|--------------------|-----------------------------|------------------------------|-----------------------------|-----------------------------|----------------------------|--------------------------|
|                    | Model 1<br>B (95% CI)       | Model 2<br>B (95% CI)        | Model 1<br>B (95% CI)       | Model 2<br>B (95% CI)       | Model 1<br>B (95% CI)      | Model 2<br>B (95% CI)    |
| Ever tried product | <b>1.94 (1.57, 2.32)</b>    | <b>1.49 (1.14, 1.84)</b>     | <b>1.6 (1.2, 2)</b>         | <b>0.96 (0.59, 1.33)</b>    | <b>0.96 (0.58, 1.33)</b>   | <b>0.82 (0.46, 1.18)</b> |
| Gender (female)    | <b>-0.7 (-1.03, -0.36)</b>  | <b>-0.42 (-0.73, -0.11)</b>  | <b>-0.81 (-1.15, -0.47)</b> | <b>-0.53 (-0.84, -0.22)</b> | <b>0.61 (0.25, 0.98)</b>   | <b>0.48 (0.13, 0.82)</b> |
| Non-white          | -0.35 (-0.74, 0.04)         | -0.02 (-0.38, 0.34)          | <b>-0.74 (-1.13, -0.35)</b> | -0.31 (-0.66, 0.05)         | -0.11 (-0.54, 0.32)        | -0.04 (-0.45, 0.37)      |
| Age                | <b>-0.04 (-0.05, -0.03)</b> | <b>-0.03 (-0.04, -0.01)</b>  | <b>-0.04 (-0.05, -0.03)</b> | <b>-0.02 (-0.04, -0.01)</b> | -0.01 (-0.02, 0.01)        | <b>-0.01 (-0.03, 0)</b>  |
| Current WL         | -0.16 (-0.68, 0.36)         | -0.1 (-0.58, 0.38)           | -0.49 (-1.02, 0.03)         | -0.23 (-0.7, 0.24)          | -0.48 (-1.06, 0.09)        | -0.19 (-0.73, 0.36)      |
| Lower risk WL      | -0.09 (-0.6, 0.43)          | -0.17 (-0.64, 0.3)           | -0.21 (-0.73, 0.32)         | -0.29 (-0.76, 0.18)         | 0.07 (-0.5, 0.65)          | 0.1 (-0.45, 0.64)        |
| FDA-approved WL    | 0.18 (-0.34, 0.7)           | 0.22 (-0.26, 0.69)           | -0.15 (-0.67, 0.38)         | 0.01 (-0.46, 0.48)          | -0.14 (-0.72, 0.44)        | -0.1 (-0.64, 0.45)       |
| Graphic WL         | -0.44 (-0.95, 0.07)         | 0 (-0.51, 0.5)               | <b>-0.72 (-1.25, -0.2)</b>  | 0.12 (-0.39, 0.64)          | <b>-0.72 (-1.3, -0.15)</b> | 0.47 (-0.15, 1.09)       |
| Anger              |                             | <b>-0.21 (-0.34, -0.09)*</b> |                             | <b>-0.15 (-0.29, -0.01)</b> |                            | -0.1 (-0.27, 0.07)       |
| Anxiety            |                             | 0.07 (-0.08, 0.22)           |                             | 0.01 (-0.15, 0.17)          |                            | -0.04 (-0.22, 0.13)      |
| Sadness            |                             | 0.05 (-0.11, 0.2)            |                             | 0.04 (-0.12, 0.2)           |                            | -0.05 (-0.22, 0.13)      |
| Guilt              |                             | 0.01 (-0.09, 0.12)           |                             | 0.03 (-0.09, 0.16)          |                            | -0.08 (-0.2, 0.05)       |
| Disgust            |                             | -0.06 (-0.15, 0.03)          |                             | <b>-0.12 (-0.22, -0.02)</b> |                            | -0.03 (-0.18, 0.12)      |
| Discouragement     |                             | -0.04 (-0.15, 0.07)          |                             | -0.03 (-0.15, 0.09)         |                            | -0.06 (-0.21, 0.08)      |
| Hope               |                             | <b>0.2 (0.11, 0.3)*</b>      |                             | <b>0.3 (0.21, 0.39)</b>     |                            | <b>0.28 (0.19, 0.37)</b> |
| Contentment        |                             | <b>0.28 (0.17, 0.39)</b>     |                             | <b>0.22 (0.12, 0.32)</b>    |                            | 0.02 (-0.09, 0.12)       |
| $R^2_{adj}$        | <b>0.26</b>                 | <b>0.39</b>                  | <b>0.22</b>                 | <b>0.38</b>                 | <b>0.6</b>                 | <b>0.17</b>              |
| $\Delta R^2$       |                             | <b>0.13</b>                  |                             | <b>0.17</b>                 |                            | <b>0.12</b>              |

Note: Multivariable linear regressions, unstandardized regression coefficients (n=823). Boldface indicates statistical significance ( $p < .05$ )

WL – warning labels. Warning labels conditions are in comparison to the condition with no warning.

\* - Significant difference ( $p < .05$ ) between the slope coefficient for smokers and the corresponding slope coefficient for non-smokers shown in Supplemental Table 2 obtained via tests of the interactions of smoking status (smoker vs. non-smoker) by emotion (each discrete emotion) to test invariance of main effects of emotions (n=1,226) across groups.

**Supplemental Table 5.** *Multivariable Associations between Demographics, Past Tobacco Use, Warning Label Condition, and Emotions and Interest in a Free Sample of Alternative Tobacco Products Among Smokers*

|                                           | Moist snuff              |                          | Snus                     |                          | E-cigarettes      |                          |
|-------------------------------------------|--------------------------|--------------------------|--------------------------|--------------------------|-------------------|--------------------------|
|                                           | Model 1                  | Model 2                  | Model 1                  | Model 2                  | Model 1           | Model 2                  |
|                                           | AOR (95% CI)             | AOR (95% CI)             | AOR (95% CI)             | AOR (95% CI)             | AOR (95% CI)      | AOR (95% CI)             |
| Ever tried product                        | <b>3.29 (2.31, 4.69)</b> | <b>2.57 (1.74, 3.78)</b> | <b>3.79 (2.57, 5.57)</b> | <b>2.67 (1.75, 4.07)</b> | 1.38 (0.96, 1.98) | 1.24 (0.85, 1.81)        |
| Gender (female)                           | <b>0.52 (0.37, 0.71)</b> | <b>0.61 (0.42, 0.87)</b> | <b>0.59 (0.43, 0.81)</b> | <b>0.68 (0.48, 0.96)</b> | 1.33 (0.94, 1.89) | 1.35 (0.93, 1.94)        |
| Non-white                                 | <b>1.82 (1.23, 2.67)</b> | 1.36 (0.88, 2.09)        | <b>1.68 (1.16, 2.42)</b> | 1.21 (0.8, 1.82)         | 0.96 (0.63, 1.44) | 0.84 (0.54, 1.29)        |
| Age                                       | <b>0.96 (0.95, 0.98)</b> | <b>0.98 (0.96, 0.99)</b> | <b>0.97 (0.96, 0.98)</b> | <b>0.98 (0.96, 0.99)</b> | 0.99 (0.98, 1)    | 0.99 (0.98, 1)           |
| Current WL                                | 0.69 (0.41, 1.15)        | 0.67 (0.39, 1.18)        | 0.73 (0.44, 1.19)        | 0.83 (0.49, 1.42)        | 0.92 (0.53, 1.59) | 1.12 (0.63, 1.99)        |
| Lower risk WL                             | 0.97 (0.59, 1.62)        | 0.85 (0.49, 1.49)        | 0.98 (0.6, 1.6)          | 0.93 (0.55, 1.57)        | 0.95 (0.55, 1.65) | 0.93 (0.53, 1.66)        |
| FDA-approved WL                           | 1.08 (0.65, 1.8)         | 1.11 (0.64, 1.93)        | 0.96 (0.59, 1.57)        | 1.07 (0.63, 1.82)        | 1.19 (0.67, 2.13) | 1.24 (0.68, 2.25)        |
| Graphic WL                                | 0.65 (0.39, 1.08)        | 0.87 (0.48, 1.6)         | <b>0.5 (0.31, 0.82)</b>  | 0.84 (0.47, 1.52)        | 0.76 (0.45, 1.3)  | 1.44 (0.75, 2.78)        |
| Anger                                     |                          | 0.89 (0.76, 1.04)        |                          | 0.95 (0.8, 1.11)         |                   | 0.89 (0.75, 1.05)        |
| Anxiety                                   |                          | 1 (0.84, 1.2)            |                          | 0.98 (0.82, 1.18)        |                   | <b>0.83 (0.69, 0.99)</b> |
| Sadness                                   |                          | 1.02 (0.84, 1.24)        |                          | 1.03 (0.85, 1.24)        |                   | 1.18 (0.99, 1.41)        |
| Guilt                                     |                          | 1.06 (0.93, 1.21)        |                          | 0.96 (0.84, 1.11)        |                   | 0.96 (0.85, 1.1)*        |
| Disgust                                   |                          | <b>0.88 (0.78, 0.99)</b> |                          | 0.97 (0.86, 1.09)        |                   | 1 (0.86, 1.16)           |
| Discouragement                            |                          | 1.07 (0.94, 1.22)        |                          | 0.97 (0.84, 1.11)        |                   | 1.03 (0.89, 1.19)        |
| Hope                                      |                          | <b>1.19 (1.07, 1.32)</b> |                          | <b>1.29 (1.17, 1.43)</b> |                   | <b>1.23 (1.11, 1.36)</b> |
| Contentment                               |                          | <b>1.28 (1.14, 1.44)</b> |                          | <b>1.22 (1.09, 1.36)</b> |                   | 1.02 (0.9, 1.14)         |
| Nagerlkerke R <sup>2</sup> <sub>adj</sub> | <b>0.28</b>              | <b>0.42</b>              | <b>0.25</b>              | <b>0.39</b>              | <b>0.03</b>       | <b>0.11</b>              |

Note: Multivariable logistic regressions (n=823). AOR – adjusted odds ratios. Boldface indicates statistical significance ( $p < .05$ )

WL – warning labels. Warning labels conditions are in comparison to the condition with no warning.

\* - Significant difference ( $p < .05$ ) between the slope coefficient for smokers and the corresponding slope coefficient for non-smokers shown in Supplemental Table 3 obtained via tests of the interactions of smoking status (smoker vs. non-smoker) by emotion (each discrete emotion) to test invariance of main effects of emotions (n=1,226) across groups.
